# Supplementary material for: Views and perspectives toward implementing the Global Spine Care Initiative (GSCI) model of care, and related spine care program by the people in Cross Lake, Northern Manitoba, Canada: a qualitative study using the Theoretical Domain Framework (TDF)
Source: PubMed Central journal article supplement — Implement Sci Commun. 2024 Sep 17;5:100. doi: 10.1186/s43058-024-00636-2 (PMC11406944; doi:10.1186/s43058-024-00636-2), 2024-09-17
Supplement: 43058_2024_636_MOESM5_ESM.pdf [file 43058_2024_636_MOESM5_ESM.pdf]

## Consolidated criteria for reporting qualitative studies (COREQ): 32-item checklist

Tong, A., P. Sainsbury, and J. Craig, Consolidated criteria for reporting qualitative research (COREQ): a 32-item checklist for interviews and focus groups. *Int J Qual Health Care*, 2007. 19(6): p. 349-57.

| No Item<br>Guide questions/description                                                                                                                                      | Pages                 |
|-----------------------------------------------------------------------------------------------------------------------------------------------------------------------------|-----------------------|
| <b>Domain 1: Research team and reflexivity</b>                                                                                                                              |                       |
| <i>Personal Characteristics</i>                                                                                                                                             |                       |
| 1. Interviewer/facilitator<br>Which author/s conducted the interview or focus group?                                                                                        | 9                     |
| 2. Credentials<br>What were the researcher's credentials? E.g. PhD, MD                                                                                                      | 32-33                 |
| 3. Occupation<br>What was their occupation at the time of the study?                                                                                                        | 1,<br>Suppl<br>file 1 |
| 4. Gender<br>Was the researcher male or female?                                                                                                                             | Suppl<br>file 1       |
| 5. Experience and training<br>What experience or training did the researcher have?                                                                                          | Suppl<br>file 1       |
| <i>Relationship with participants</i>                                                                                                                                       |                       |
| 6. Relationship established Was a relationship established prior to study commencement?                                                                                     | 6-8                   |
| 7. Participant knowledge of the interviewer<br>What did the participants know about the researcher? e.g. personal goals, reasons for doing the research                     | 8, 21                 |
| 8. Interviewer characteristics<br>What characteristics were reported about the interviewer/facilitator? e.g. Bias, assumptions, reasons and interests in the research topic | 8,<br>Suppl<br>file 1 |
| <b>Domain 2: study design</b>                                                                                                                                               |                       |

|                                                                                                                                                                                                      |     |
|------------------------------------------------------------------------------------------------------------------------------------------------------------------------------------------------------|-----|
| <b><i>Theoretical framework</i></b>                                                                                                                                                                  |     |
| 9. Methodological orientation and Theory<br>What methodological orientation was stated to underpin the study? e.g. grounded theory, discourse analysis, ethnography, phenomenology, content analysis | 8   |
| <b><i>Participant selection</i></b>                                                                                                                                                                  |     |
| 10. Sampling<br>How were participants selected? e.g. purposive, convenience, consecutive, snowball                                                                                                   | 8   |
| 11. Method of approach<br>How were participants approached? e.g. face-to-face, telephone, mail, email                                                                                                | 8   |
| 12. Sample size<br>How many participants were in the study?                                                                                                                                          | 11  |
| 13. Non-participation<br>How many people refused to participate or dropped out? Reasons?                                                                                                             | N/A |
| <b><i>Setting</i></b>                                                                                                                                                                                |     |
| 14. Setting of data collection<br>Where was the data collected? e.g. home, clinic, workplace                                                                                                         | 6-7 |
| 15. Presence of non-participants<br>Was anyone else present besides the participants and researchers?                                                                                                | N/A |
| 16. Description of sample<br>What are the important characteristics of the sample? e.g. demographic data, date                                                                                       | 11  |
| <b><i>Data collection</i></b>                                                                                                                                                                        |     |
| 17. Interview guide<br>Were questions, prompts, guides provided by the authors? Was it pilot tested?                                                                                                 | 9   |
| 18. Repeat interviews<br>Were repeat interviews carried out? If yes, how many?                                                                                                                       | No  |
| 19. Audio/visual recording<br>Did the research use audio or visual recording to collect the data?                                                                                                    | 9   |
| 20. Field notes                                                                                                                                                                                      | 9   |

|                                                                                                                                                               |                          |
|---------------------------------------------------------------------------------------------------------------------------------------------------------------|--------------------------|
| Were field notes made during and/or after the interview or focus group?                                                                                       |                          |
| 21. Duration<br>What was the duration of the interviews or focus group?                                                                                       | 9                        |
| 22. Data saturation<br>Was data saturation discussed?                                                                                                         | 26                       |
| 23. Transcripts returned<br>Were transcripts returned to participants for comment and/or correction?                                                          | No                       |
| <b>Domain 3: analysis and findings</b>                                                                                                                        |                          |
| <b><i>Data analysis</i></b>                                                                                                                                   |                          |
| 24. Number of data coders<br>How many data coders coded the data?                                                                                             | 10                       |
| 25. Description of the coding tree<br>Did authors provide a description of the coding tree?                                                                   | 10                       |
| 26. Derivation of themes<br>Were themes identified in advance or derived from the data?                                                                       | 10                       |
| 27. Software<br>What software, if applicable, was used to manage the data?                                                                                    | 10                       |
| 28. Participant checking<br>Did participants provide feedback on the findings?                                                                                | 8, 10,<br>21,<br>Table 2 |
| <b><i>Reporting</i></b>                                                                                                                                       |                          |
| 29. Quotations presented<br>Were participant quotations presented to illustrate the themes / findings? Was each quotation identified? e.g. participant number | 12-21,<br>Table1         |
| 30. Data and findings consistent<br>Was there consistency between the data presented and the findings?                                                        | 11-21,<br>Table1         |
| 31. Clarity of major themes<br>Were major themes clearly presented in the findings?                                                                           | 11-21                    |

|                                                                                                    |       |
|----------------------------------------------------------------------------------------------------|-------|
| 32. Clarity of minor themes Is there a description of diverse cases or discussion of minor themes? | 11-21 |
|----------------------------------------------------------------------------------------------------|-------|
